# Supplementary material for: Lonicera caerulea Extract Attenuates Non-Alcoholic Fatty Liver Disease in Free Fatty Acid-Induced HepG2 Hepatocytes and in High Fat Diet-Fed Mice
Source: PubMed Central journal article supplement (PMC6471428; doi:10.3390/nu11030494), 2019-02-26
Supplement: nutrients-11-00494-s001.pdf [file nutrients-11-00494-s001.pdf]

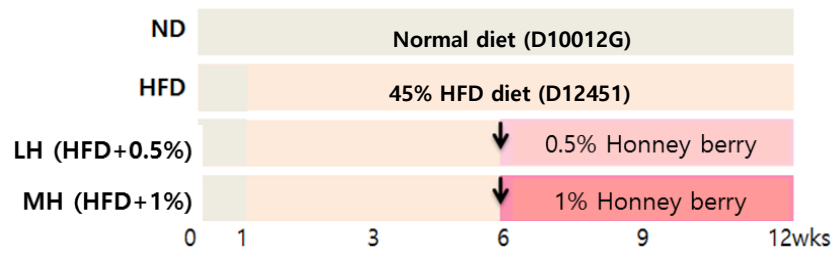

**Supplement figure 1.** Schematic overview of the experimental design.

**Supplement Table 1.** Calculated diet composition of HFD groups.

| Class description | Ingredient                           | HFD        | HFD<br>with 0.5% HBE | HFD<br>with 1% HBE |
|-------------------|--------------------------------------|------------|----------------------|--------------------|
| Protein           | Casein, Lactic, 30 Mesh              | 23.3       | 23.2                 | 23.1               |
| Protein           | Cystine, L                           | 0.3        | 0.3                  | 0.3                |
| Carbohydrate      | Sucrose, Fine Granulated             | 20.6       | 20.5                 | 20.4               |
| Carbohydrate      | Lodex 10                             | 11.7       | 11.6                 | 11.5               |
| Carbohydrate      | Starch, Corn                         | 8.5        | 8.4                  | 8.4                |
| Fiber             | Solka Floc, FCC200                   | 5.8        | 5.8                  | 5.8                |
| Fat               | Lard                                 | 20.7       | 20.6                 | 20.5               |
| Fat               | Soybean Oil, USP                     | 2.9        | 2.9                  | 2.9                |
| Mineral           | S10026B                              | 5.8        | 5.8                  | 5.8                |
| Vitamin           | Choline Bitartrate                   | 0.2        | 0.2                  | 0.2                |
| Vitamin           | V10001C                              | 0.1        | 0.1                  | 0.1                |
| Dye               | Dye, Red FD&C #40, Alum. Lake 35-42% | 0.0        | 0.0                  | 0.0                |
|                   | <b>Honeyberry Extract (HBE)</b>      | <b>0</b>   | <b>0.5</b>           | <b>1</b>           |
|                   | <b>Total (g)</b>                     | <b>100</b> | <b>100</b>           | <b>100</b>         |
